# Supplementary material for: Metabolic and Proteomic Analysis of Chlorella sorokiniana, Chloroidium saccharofilum, and Chlorella vulgaris Cells Cultured in Autotrophic, Photoheterotrophic, and Mixotrophic Cultivation Modes
Source: MDPI journal article supplement (doi:10.3390/molecules27154817), 2022-07-27
Supplement: s1 [file s1]

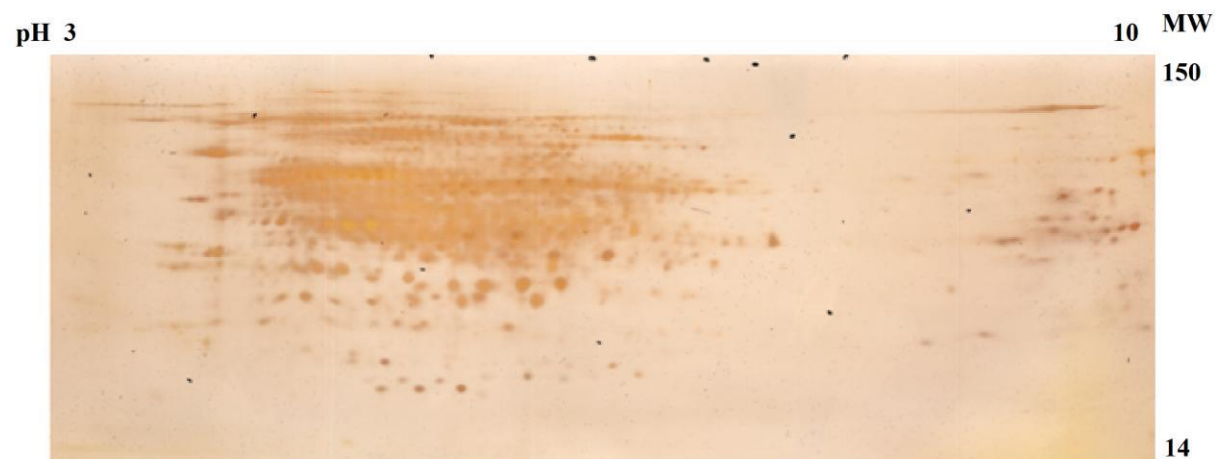

**Figure S1.** 2-DE protein map of *Chlorella saccharopilum* (mixotrophic).

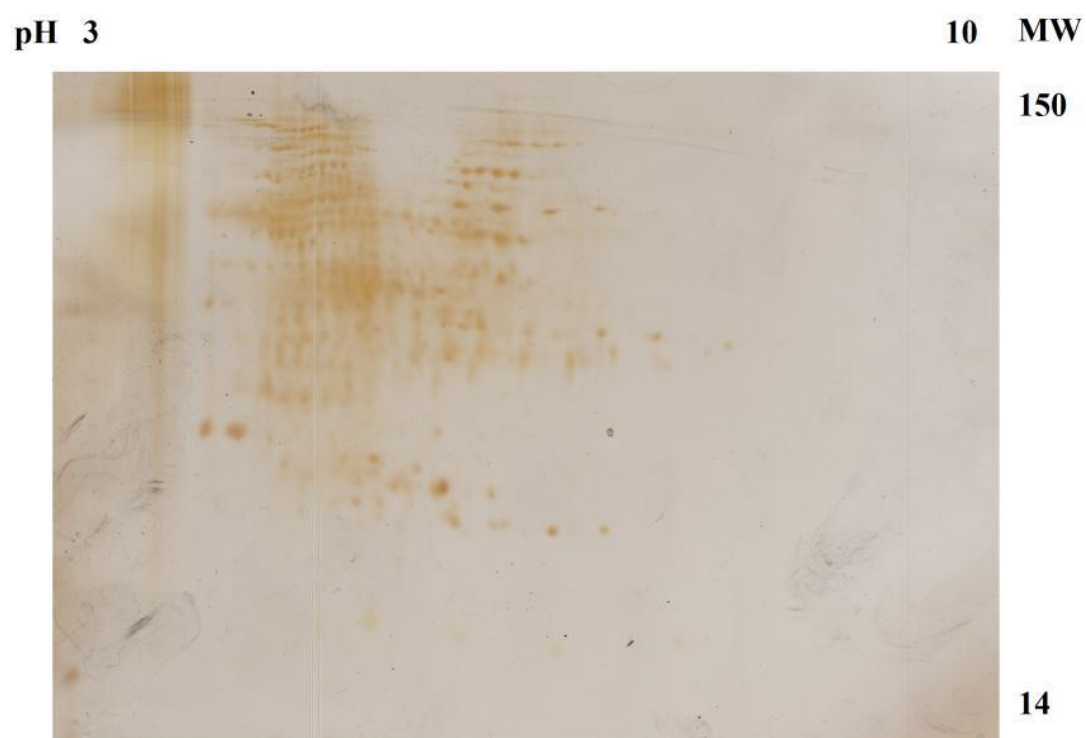

**Figure S2.** 2-DE protein map of *Chlorella sorokiniana* (autotrophic).

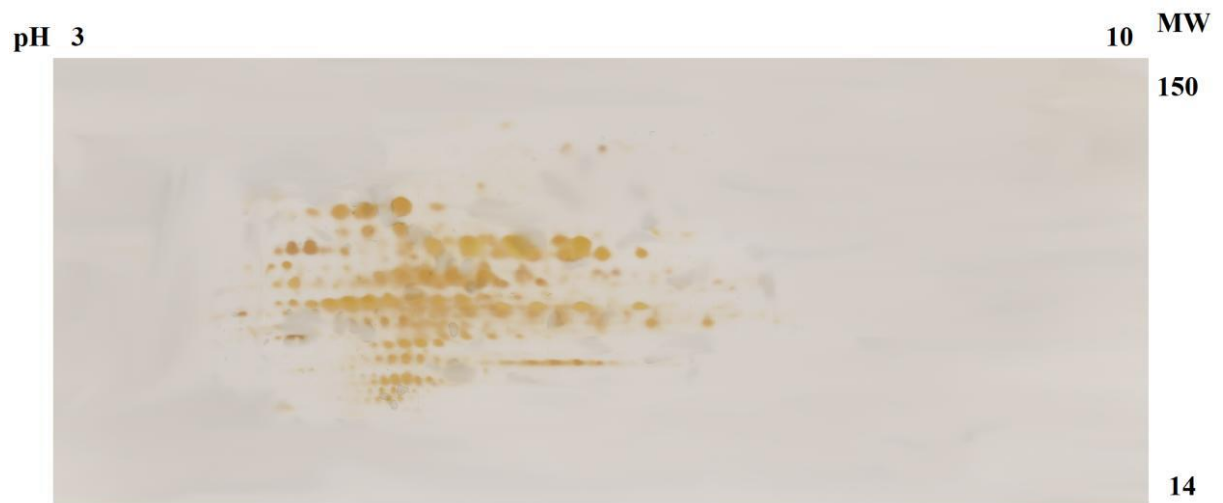

*Figure S3: 2-DE protein map of Chlorella sorokiniana (photoheterotrophic).*

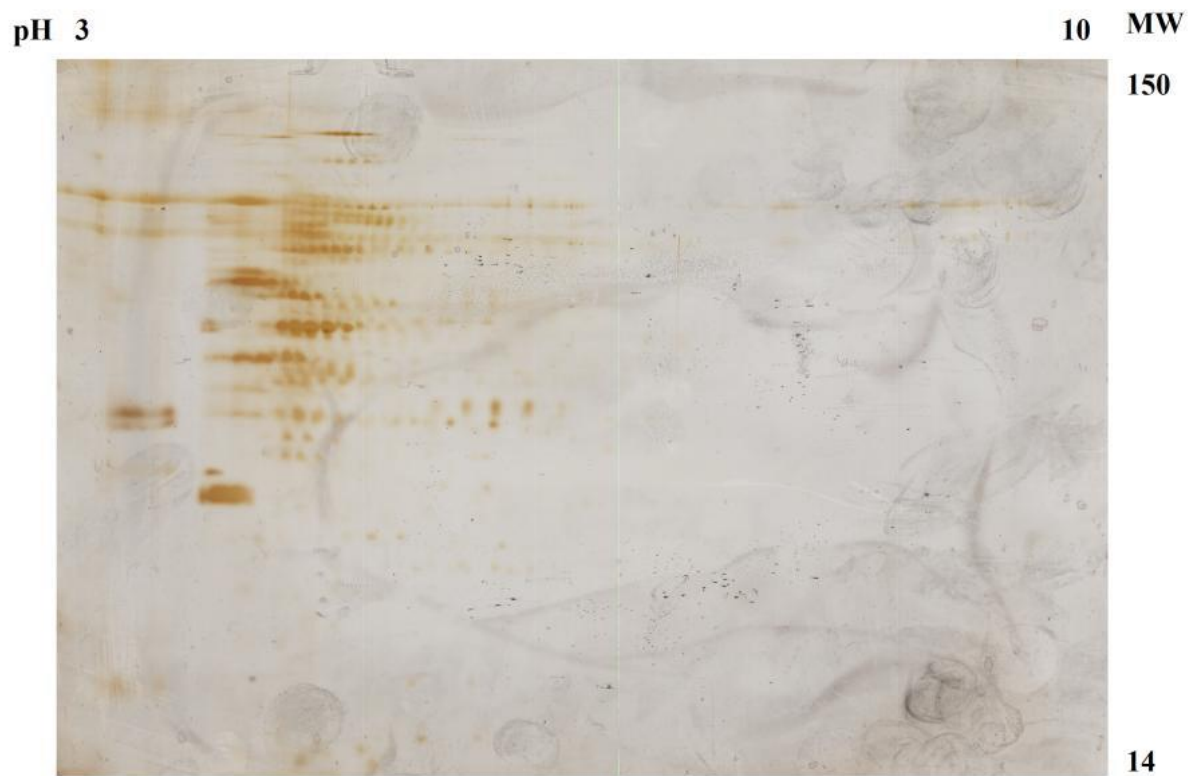

*Figure S4: 2-DE protein map of Chlorella vulgaris (autotrophic).*

pH 3

10 MW

150

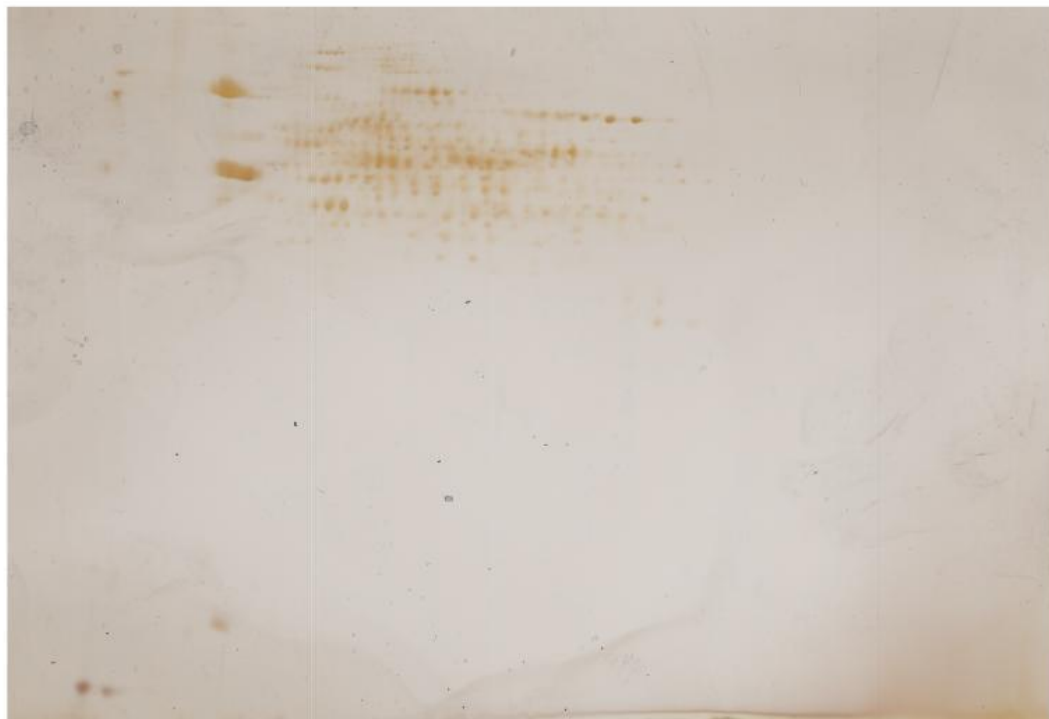

14

Figure S5: 2-DE protein map of *Chlorella vulgaris* (mixotrophic).
